# Supplementary material for: Bioinformatic, Enzymatic, and Structural Characterization of Trichuris suis Hexosaminidase HEX-2
Source: PubMed Central journal article supplement (PMC11308363; doi:10.1021/acs.biochem.4c00187), 2024-07-26
Supplement: bi4c00187_si_001.pdf [file bi4c00187_si_001.pdf]

## **Bioinformatic, enzymatic and structural characterization of *Trichuris suis* hexosaminidase HEX-2**

*Zuzanna Dutkiewicz<sup>1,†</sup>, Annabelle Varrot<sup>2</sup>, Karen J. Breese<sup>3</sup>, Keith A. Stubbs<sup>3,4</sup>, Lena Nuschy<sup>1</sup>,*

*Isabella Adduci<sup>5</sup>, Katharina Paschinger<sup>1</sup> and Iain B. H. Wilson<sup>1,\*</sup>*

<sup>1</sup> Institut für Biochemie, Department für Chemie, Universität für Bodenkultur, Muthgasse 18, 1190 Wien, Austria

<sup>2</sup> Univ. Grenoble Alpes, CNRS, CERMAV, 38000 Grenoble, France

<sup>3</sup> School of Molecular Sciences, University of Western Australia, Crawley, WA 6009, Australia

<sup>4</sup> ARC Training Centre for Next-Gen Technologies in Biomedical Analysis, School of Molecular Sciences, University of Western Australia, Crawley, WA 6009, Australia

<sup>5</sup> Institut für Parasitologie, Department für Pathobiologie, Veterinärmedizinische Universität Wien, Veterinärplatz 1, A-1210 Wien, Austria

† Current address: Institut für Mikrobiologie, Universität Innsbruck, A-6020 Innsbruck, Austria

\* Correspondence to: [iain.wilson@boku.ac.at](mailto:iain.wilson@boku.ac.at)

### **Supporting Information**

Supplementary Figures S1-S6

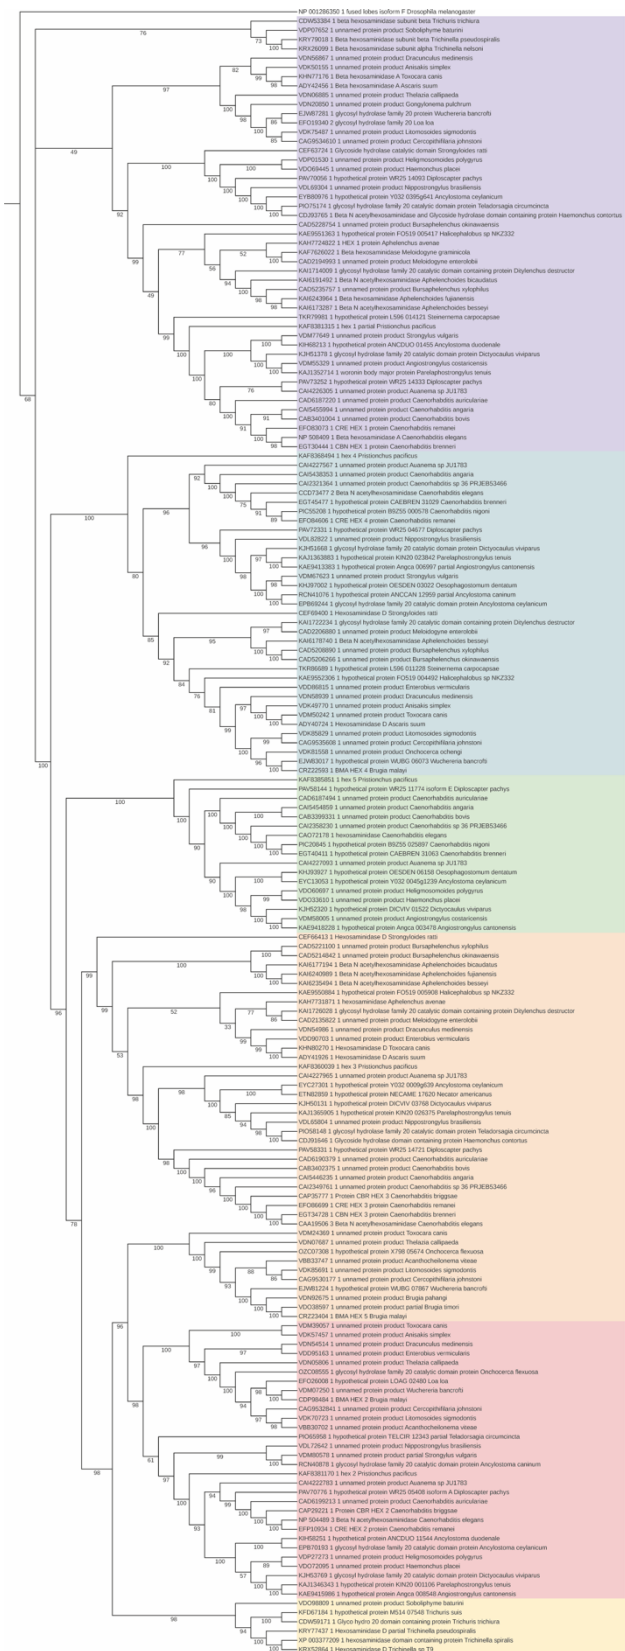

**Supplementary Figure S1A:** Full phylogenetic tree of nematode subfamily 1 GH20 hexosaminidases – these data underly **Figure 2** in the main text. *D. melanogaster* FDL (fused lobes hexosaminidase) was used as an out group. Bootstrap values of more than 70 are shown.

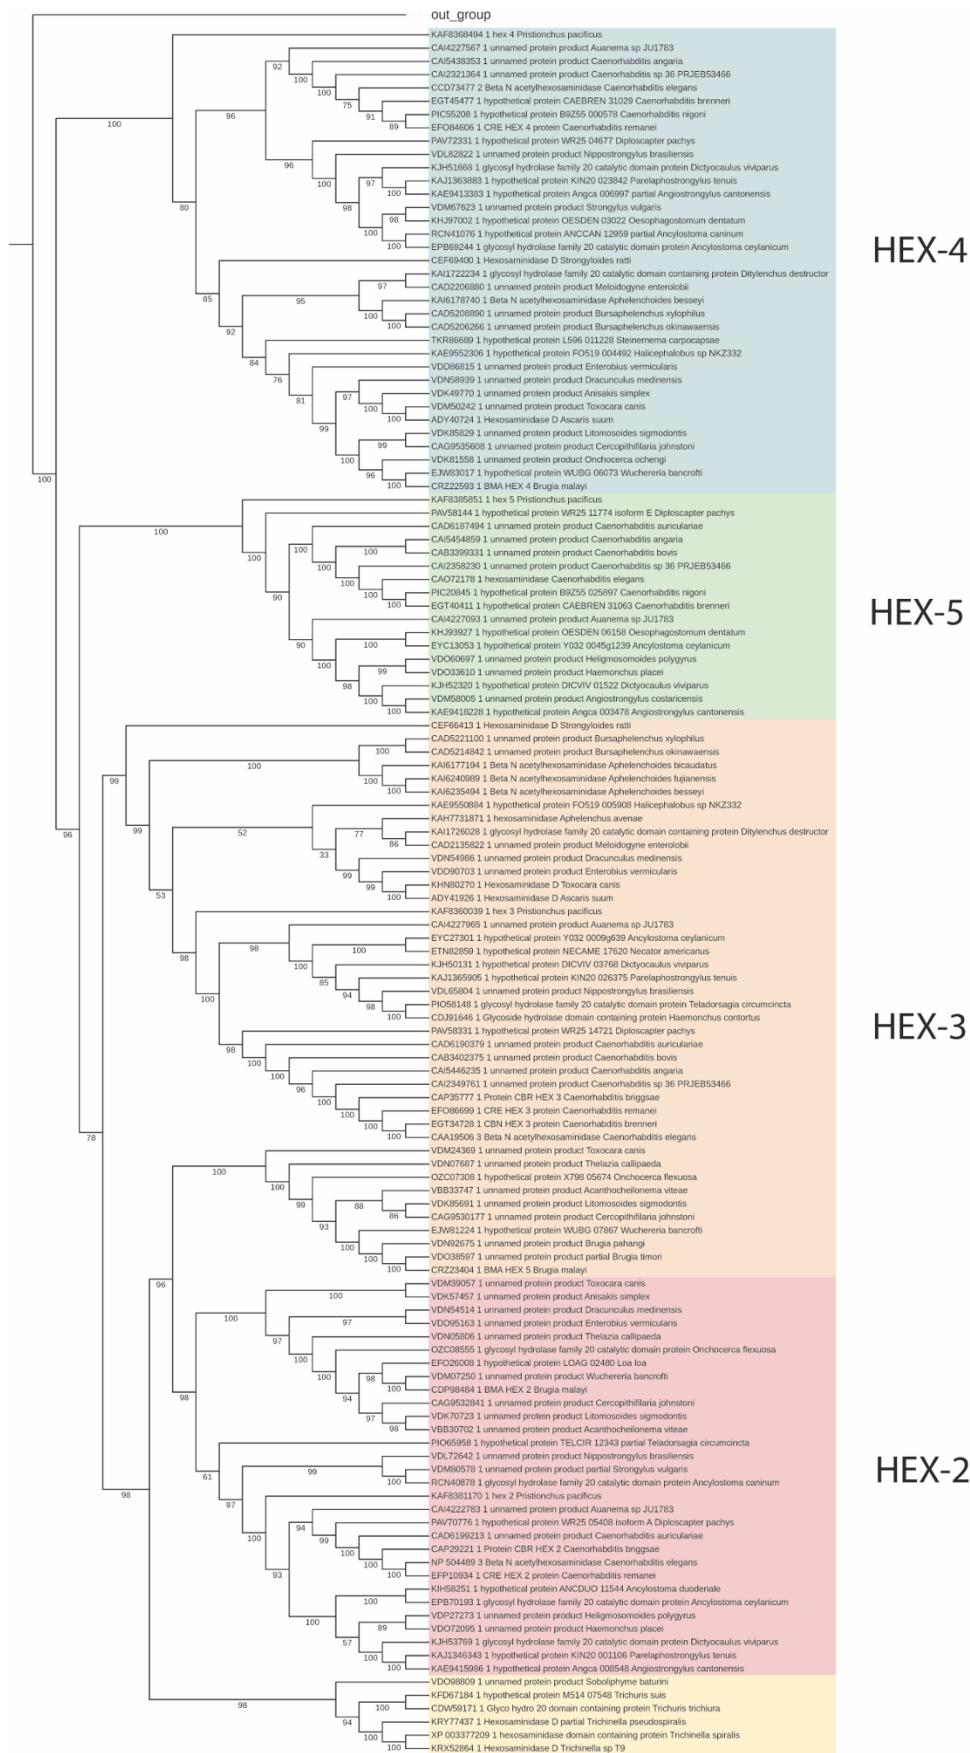

**Supplementary Figure S1B:** Full phylogenetic tree of all nematode GH20 hexosaminidases – these data underly **Figure 2** in the main text. *D. melanogaster* FDL was used as an out group. Bootstrap values of more than 70 are shown.

**A) Full theoretical sequence:**

```

1 MTGKKCAFVQ HKYSKLRQDY VLQDDNEVAT GRSVADSNNR RYFTVMKVYR WRGKPAFAFI TVLTVILLII GYHTITSRHG
81 DTVIHEGVFQ RGAAMRKRTV YGQVDEKSSP TSTSTDLTMK TTTTYSQNLK EPPPSNVFIP KRRIVHLDLK GAAPKQHFH
161 AFFEYFVRIG ATGILIEWED MFPYEGRLSD LRNGDAYSAD DVRMILSTAD QLRLEVIPLV QTIGHLEWLL KTHKFYSFRE
241 NPRNPQSVCV SNAEAVDLVL HLVDQVMAFH KDYGQFVHIG ADEVYQYGEC SRCVARMNKE NLRREDLLLR HIVNVSKHVK
321 TKYGKNVLMW HDMIANIDAS LAEKYDLKNL VEPVLWNYAE DLEAFPLMGI WETFSAMVPY MWGSSAFKGA DSPTRYHSNV
401 KHYLENHISW IKQMSTASEK FREFRGLIFT GWQRYDHFAV LCEFLPIGIP SLTVNMLTIR NGRFDASVND QAISIMQCVT
481 GSDVKGDLYG CRFPGSDIYH HVQLLHEKKG EIEKLLQQS VQGWSNIAI DYNMSSPWYM NLIVPDLMTY KNQMIELSLN
561 IRQAMLEMFY ENAVDEFLFT YVDPVINHLQ RLLDRATAIQ RRDEFPVRFPIKRTIDTTR

```

**B) Long secreted form:**

```

HEGVFQ RGAAMRKRTV YGQVDEKSSP TSTSTDLTMK TTTTYSQNLK EPPPSNVFIP KRRIVHLDLK GAAPKQHFH
161 AFFEYFVRIG ATGILIEWED MFPYEGRLSD LRNGDAYSAD DVRMILSTAD QLRLEVIPLV QTIGHLEWLL KTHKFYSFRE
241 NPRNPQSVCV SNAEAVDLVL HLVDQVMAFH KDYGQFVHIG ADEVYQYGEC SRCVARMNKE NLRREDLLLR HIVNVSKHVK
321 TKYGKNVLMW HDMIANIDAS LAEKYDLKNL VEPVLWNYAE DLEAFPLMGI WETFSAMVPY MWGSSAFKGA DSPTRYHSNV
401 KHYLENHISW IKQMSTASEK FREFRGLIFT GWQRYDHFAV LCEFLPIGIP SLTVNMLTIR NGRFDASVND QAISIMQCVT
481 GSDVKGDLYG CRFPGSDIYH HVQLLHEKKG EIEKLLQQS VQGWSNIAI DYNMSSPWYM NLIVPDLMTY KNQMIELSLN
561 IRQAMLEMFY ENAVDEFLFT YVDPVINHLQ RLLDRATAIQ RRDEFPVRFPIKRTIDTTR AVDDHHHHH

```

**C) Alignment with *C. elegans* HEX-2**

```

Query 124 TYSQNLKEPPPSNVFIPKRRIVHLDLKGAAKPKQHFRAFFEYFVRIGATGILIEWEDMFP 183
T ++ P N F K ++H DLKGA PK +F + GATGIL+EWEDMFP
Sbjct 96 TQEVKIERPSRDNEFY-KNVVIHFDLKGAPPKVDYFLDLLRLIAKGGATGILLEWEDMFP 154

Query 184 YEGRLSDLRNGDAYSADDVRMILSTADQLRLEVIPLVQTIGHLEWLLKTHKFYSFRENPR 243
+ G+L +N DAYS DV MILS A +L+L+VIPLVQT GHLEW+LK + +REN
Sbjct 155 WTGKLEQFKNTDAYSESDVDMILSEATKLLKLDVIPLVQTFGHLEWILKYEEMRKYRENDA 214

Query 244 NPQSVCSNAEAVDLVLHLVDQVMAFHDKYG-QFVHIGADEVYQYGEC SRCV--ARMNKE 300
PQ +C+ N E V+ V ++ QV H YG F HIGADE +++G C + + N +
Sbjct 215 YPQVLCCLGNEEGVEFVREMIRQVAKKHAKYGIPIFFHIGADEAFEFQVGCQESLDWIKKNGK 274

Query 301 NLRREDLLLRHIVNVSKHVKT KYGKN--VLMWHDMIANIDASLAEKYDLKNLVEPVLWNY 358
N R++ L L H+ +++ K + G + +L WHDM+ + D+ L + +L +++PV+W+Y
Sbjct 275 NGRKQLLALAHKAI AEFKQQTGDSTQILAWHMLKDFDSRLIKNLELGQIIQPVVWDY 334

Query 359 AEDLEAFPLMGIWETFSAMVPYMWGSSAFKGA DSPTRYHSNVKHYLENHISWIKQMSTAS 418
+E++ L I+ + P MW SSA+KGA+ P+ S V+HY N+ +WI+
Sbjct 335 SENI-ITLNDYIFSALAENFPTMWASSAYKGANYPASASTSEVRHYETNNRNWIRTKQNQE 393

Query 419 EKFRE-FRGLIFTGWQRYDHFAVLCEFLPIGIPSLTVNMLTIRNG-RFD-ASVNDQAISI 475
KF+ F+G+I TGWQRYDH A LCE LPIG S+ + M N D +A ++
Sbjct 394 RKFKNGFGQGIIVTGWQRYDHLAGLACETLPIGTASMMQMIALNAPALDLEGTRQKAATL 453

Query 476 MQC----VTGSDVKGDLYGCRFPGSDIYHHVQ-----LLHEKKG EIEKLLQQSVQGWLS 526
++C V G V + C++ G Y Q L E+ K + GW +
Sbjct 454 LECQGFNVGKVVSN--QCKYRGFTYLIYQSEVPNLFARIDSELSK---NHHLMGWAN 508

Query 527 NIAIDYNMSSPWYMLIVPDLMTYKNQMIELSLNIRQAMLEMFYENAVDEFLFTYVDPVI 586
YN+S WY ++P + Q + ++R +M ++++EN +DEF++ + +
Sbjct 509 RYNRKYNISQNWYHREMLPFVQQLVQYDRVESDLRASMKDLYFENTIDEFIYENLGEMS 568

Query 587 NHLQRLDRATAIQRRDEFPVRFPIKR 614
L L+ + + +P R FPIK+
Sbjct 569 EKLHGYLEEIQRDLKLRAPKRRHFPIK 596

```

**Supplementary Figure S2:** (A) Sequence of the predicted subfamily 1 hexosaminidase (HEX-2) from *T. suis* (hypothetical protein M514\_07548; NCBI accession KFD67184). The predicted transmembrane domain absent from all recombinant protein constructs is in red, the potential N-glycosylation sites are underlined and the conserved HIGADE active site region is indicated in bold; the actual initial methionine residue is unknown but two are N-terminal to the transmembrane domain. (B) Sequence of the recombinant long secreted form (expected M<sub>r</sub> 63 kDa) used for X-ray crystallography; the N-terminal disordered region absent from the recombinant short secreted form (expected M<sub>r</sub> 57 kDa) is italicized. (C) Alignment of *T. suis* and *C. elegans* HEX-2 (36% identity over 508 residues).

```

41      50      60      70      80      90      100
TsHEX-2 YSQNLKEPPFSNVFIPKRRIVHLDLKGAAPKPQHFRAFFEYFVRIGATGILIEWEDMFPY
CeHEX-2 QEVKIERPSRDNEFY.KNVVIHFDLKGAPPKVDYFLDLLRLIAKGGATGILLEWEDMFPW
Hs_HexA . . . . PRFPHRGLLLDTSRHYLPLSSILDTLDVMAYNKLNVFHWHLVDDPSFPYESFTFPE
Hs_HexB . . . . PRFSHRGLLLDTSRHYLPVKIILKTLDAMAFNKFNVLHWHIVDDQSFYQSITFPE
Dm_fdl . . . . PKFRYRGLMLDTSRHFFSVESIKRTIVGMGLAKMNRFWHLTDAQSFYISRYYPE
OfHex1 . . . . PVYPYRGLLLDTARNYYSIESIKRTIEAMAAVKLNTFHWHITDSQSFPFVTTKRPN

110      120      130      140
TsHEX-2 EGRLSDLRN.GDAYSADDVRMILSTADQLRLEVIPLVQTIGH..LEW.....LLKTH
CeHEX-2 TGKLEQFKN.TDAYSESDVDMILSEATKLKLDVIPLVQTFGH..LEW.....ILKYE
Hs_HexA LMRKGSYNPVTHIYTAQDVKEVIEYARLRGIRVLAEFDTPGHT.LSWGPGI...PGLLTP
Hs_HexB LSNKGSYS.LSHVYTPNDVRMVIEYARLRGIRVLPEFDTPGHT.LSWGKQ...KDLLTP
Dm_fdl LAVHGAYSE.SETYSEODVREVAEFAKIYGVQVIPEIDAPAHAGNGWDWGPKRGMGELAM
OfHex1 LYKFGALSP.QKVYTKAAIREVVRFGLERGVRVLPEFDAPAHVGEGWQ.....DTDLTV

150      160      170      180      190      200
TsHEX-2 KFYSFRENPRNPQSVCVSNAAEAVDLVLHLVDQVMAFHKDYG.Q..FVHIGADEVYQ..YG
CeHEX-2 EMRKYRENDAYPQVLCLGNEEGVEFVREMIRQVAKKHAKYGIP..FFHIGADEAFE..FG
Hs_HexA CYSGSEPSG....TFGPVNPSLNNTYEFMTSTFFLEVSSVF.PDFYLHLGDEVDFTCWK
Hs_HexB CYSRQNKLD....SFGPINPTLNNTYSFLTTFFKEISEVF.PDQFIHLGDEVEFKWE
Dm_fdl CINQQPWSFYCGEPPCGQLNPKNNYTYLILQRIYEELLQHTGPTDFFHLGDEVNLDCW.
OfHex1 CFKAEPWKSYCVEPPCGQLNPTKDELYQYLEEDIYSDMAEVFDTTDIFHMGDEVSEACWN
catalytic site

210      220      230      240      250
TsHEX-2 ECSRCV..ARMNKENLRREDLL..RHIVNVSKHVKTKYGKN...VLMWHDMIANIDASL
CeHEX-2 VCQESLDWIKKNGKNGRKQLL..AHLKAIAEFAKQQTGDSTHQILAWWHDMLKDFDSRL
Hs_HexA SNPEIQDFMRKKGF..EDFKQLESFYIQTLLDIVSSYG...KGYVVWQEVFDNK...
Hs_HexB SNPKIQDFMRQKGF..TDFKKLESFYIQVLDIATIN...KGSIVWQEVFDDK...
Dm_fdl .AQYFNDTDLRGLWC...DFM...LQAMARLKLANNGVAPKHVAVWSSALTNTK...
OfHex1 SSSDIQNFMMQNRWDLDKESFLKLWNYFQQKAQDKAYKAFGKKLPLILWTSTLTNYKHID

260      270      280      290      300      310
TsHEX-2 AEKYDLKNLVEPVLWNYAEDLEAFLPMGIWETFSAMVPYMWGSSAFKGADSPTRYHSNVK
CeHEX-2 IKNLELQIIQPVVWDYSENIITLDNYIFSALAENFTMWASSAYKGANYPSASTSEVR
Hs_HexA .VKIQPDTIIQVWREDIPVNYMKELE...LVTKAGFRALLSAPWYLNRISYYGDWKDFYV
Hs_HexB .AKLAPGTIVEVWKDSA...YPEELS...RVTASGFPVILSAPWYLDLISYGDWRKYYK
Dm_fdl .CLPNSQFTVQVWGGSTWQENYDLLDNGYNIVIFSHVDAWYLDCGFGSWRATGDAACAPYR
OfHex1 DYLNKDDYIIQVWTTGVDPQIKGLLEKGYRLIMSNYDALYFDCGYGAWVGAGNNWCSPYI

320      330      340      350      360      370
TsHEX-2 HYLENHISWI..KQMSTASEKREFRGLIFTGWQRYDHFAVLCEFL.PIGIPSLTVNMLTI
CeHEX-2 HYETNNRNWIRTKQNERKFKKNGFQGIIVTGQRYDHLAGLCETL.PIGTASMMLQMQIA
Hs_HexA VEPLAFEGTP.....EQKALVIGGEACMWGEYVDNTNLVPRLWPRAGAVAERLWSNK
Hs_HexB VEPLDFGGTQ.....KQKQLFIGGEACIWGEYVDATNLTPRLWPRASAVGERLWSSK
Dm_fdl TWQNVYKHRPWERMRLDKKRKQVLGEVCMWTEQVDENQLDNRLWPRTAALAERLWTDP
OfHex1 GWQKVYDNSP...AVIALEHRDQVLGGEAALWSEQSDTSTLDGRLWPRAAALAERLWAEP

```

**Supplementary Figure S3:** Alignment of *T. suis* and *C. elegans* HEX-2 (both subfamily 1), human HEXA and HEXB, *Drosophila melanogaster* FDL and *Ostrinia furnacalis* OfHex1 (subfamily 2). Sequences were shortened to the region of highest homology and aligned using Multalin, <http://multalin.toulouse.inra.fr/> - the file was processed on <https://esprict.ibcp.fr/ESPrict/ESPrict/>. Crystal structures exist for human hexosaminidases A and B as well as OfHex1, while HEX-2 and FDL specifically remove the  $\beta$ 1,2GlcNAc from the  $\alpha$ 1,3-mannose of N-glycans. Only the catalytic site as well as a region towards the N-terminus is well conserved between the two subfamilies. Highlighted in blue are selected key subfamily-specific residues identified in this and other structural studies (other than those conserved across the families in red).

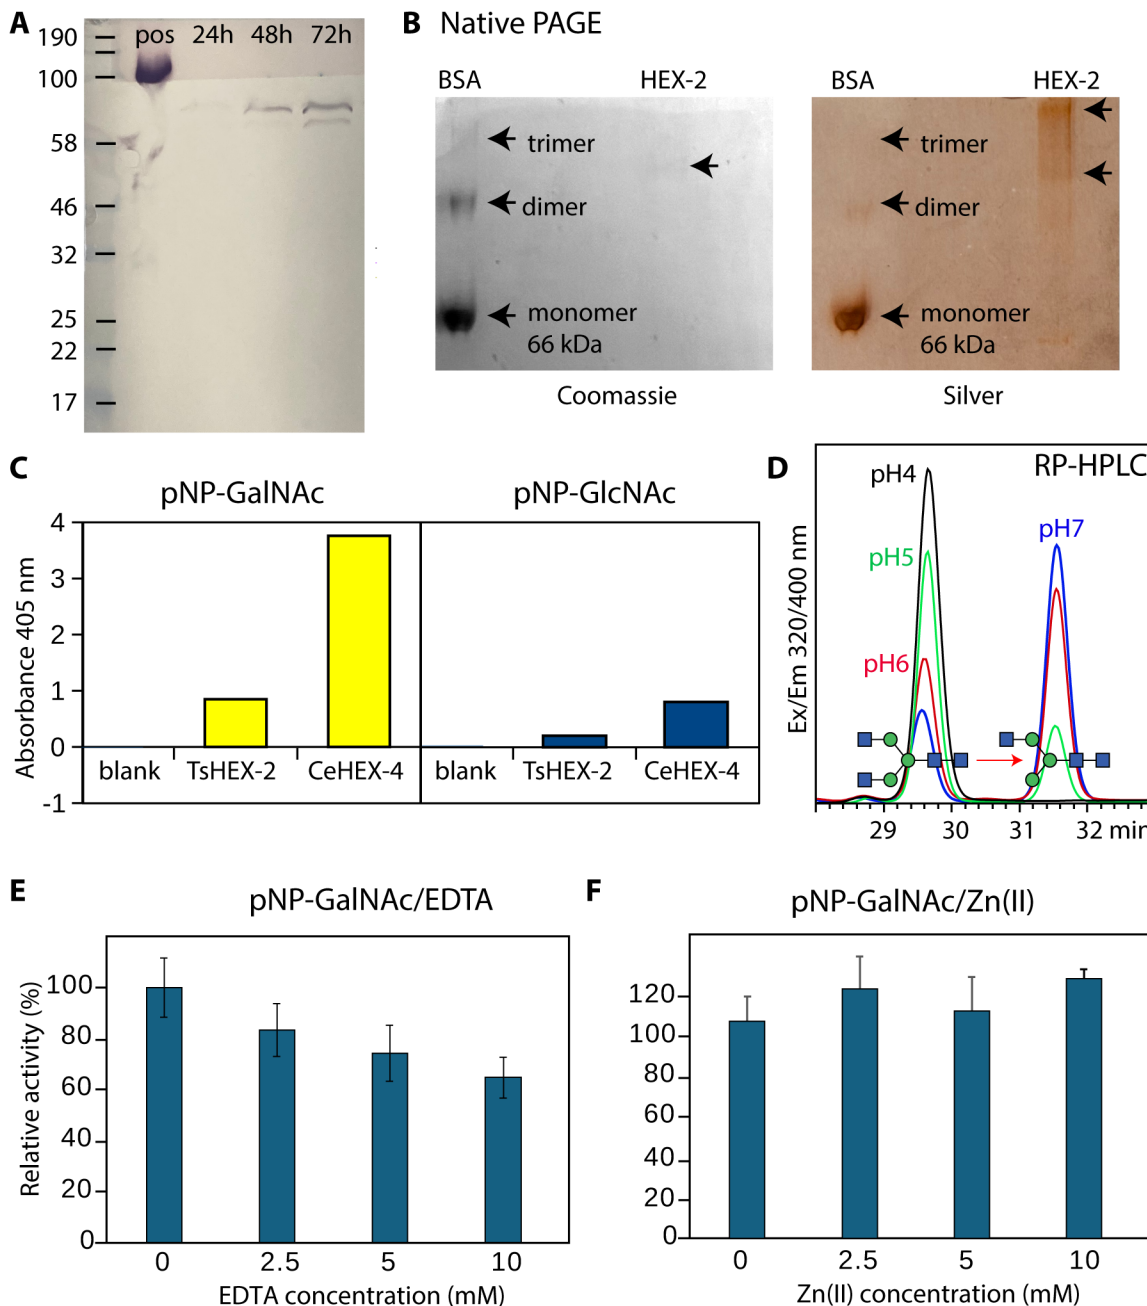

**Supplementary Figure S4:** (A) Expression of the recombinant secreted 'long' form of *T. suis* HEX-2 (expected  $M_r$  63 kDa; N-terminal His/FLAG-tag) as detected by anti-FLAG Western blotting of *Pichia* culture supernatants after 24, 48 or 72 hours of induction. (B) Native gel electrophoresis of bovine serum albumin (BSA) and *T. suis* HEX-2 followed by either Coomassie or silver staining suggests that HEX-2 exists as in multimeric forms; BSA has monomeric/dimeric/trimeric molecular masses of 66, 132 and 198 kDa, whereas the dimeric form of HEX-2 would have a mass of 150 kDa as compared to the 75 kDa observed on the reducing/denaturing SDS-PAGE and Western blot. (C) Activity towards pNP- $\beta$ -GalNAc and pNP- $\beta$ -GlcNAc of *T. suis* HEX-2 and *C. elegans* HEX-4 expressed in *Pichia pastoris*; the turnover of the aryl GalNAc substrate is some three- or fourfold higher than that of the aryl GlcNAc in keeping with data on other subfamily 1 GH20 hexosaminidases. (D) Activity of *T. suis* HEX-2 at different pH values towards GnGn-PA; the appearance of the GnM-PA product of later RP-HPLC elution time (31.5 mins; see also **Figure 4** of the main text) is most pronounced at pH 6 and 7, in keeping with the optimum found with the aryl GalNAc substrate (see **Figure 3** of the main text). (E and F) Activity towards pNP- $\beta$ -GalNAc of *T. suis* HEX-2 in the absence or presence of up to 10 mM EDTA or ZnCl<sub>2</sub>, indicating minimal effect of divalent cations.

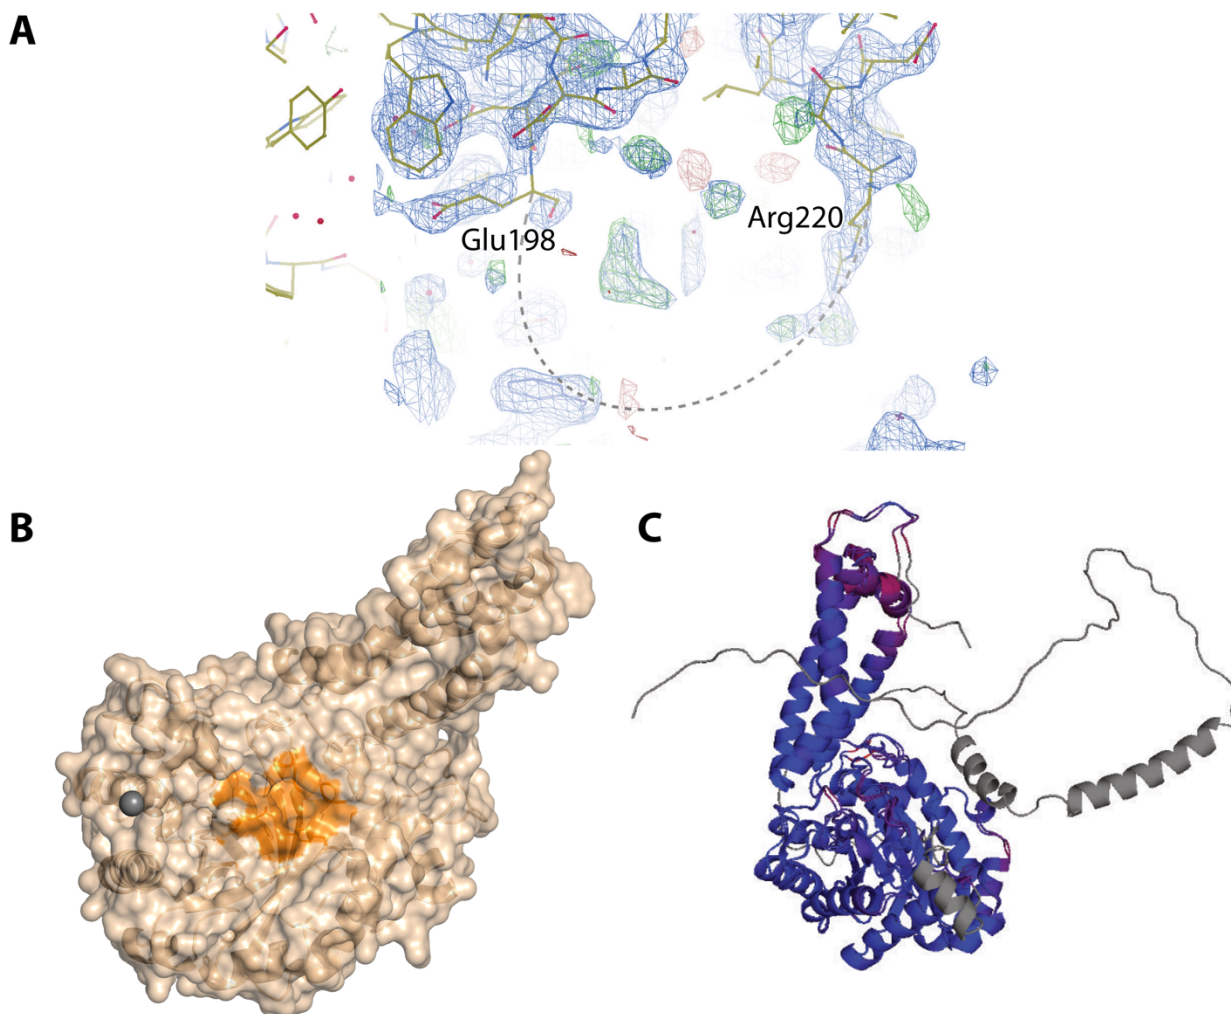

**Supplementary Figure S5:** (A) Electron density maps in the disordered area of the *T. suis* HEX-2 structure, visualized with Coot (version 0.9.8.3). Difference map Fo-DFc map is represented in green (positive) and red (negative) at 3 sigmas whilst 2Fo-DFc is represented in blue at 1 sigma ( $0.23 \text{ e}\text{\AA}^3$ ). (B) Cartoon and surface representation of crystal structure of *T. suis* HEX-2 at  $2.55 \text{ \AA}$ . The grey ball represents the  $\text{Zn}^{2+}$  ion, the binding site pocket is colored in orange with presumed catalytic amino acids displayed in sticks. (C) Comparison of the *T. suis* HEX-2 X-ray structure and the Alpha Fold model, coloured by RMSD (blue specifying the minimum pairwise RMSD and red indicating the maximum, unaligned residues are coloured grey), visualized with pymol (free version 2.5.0, Schrodinger LLC). See also **Figures 6 and 7** of the main text for other visualisations.

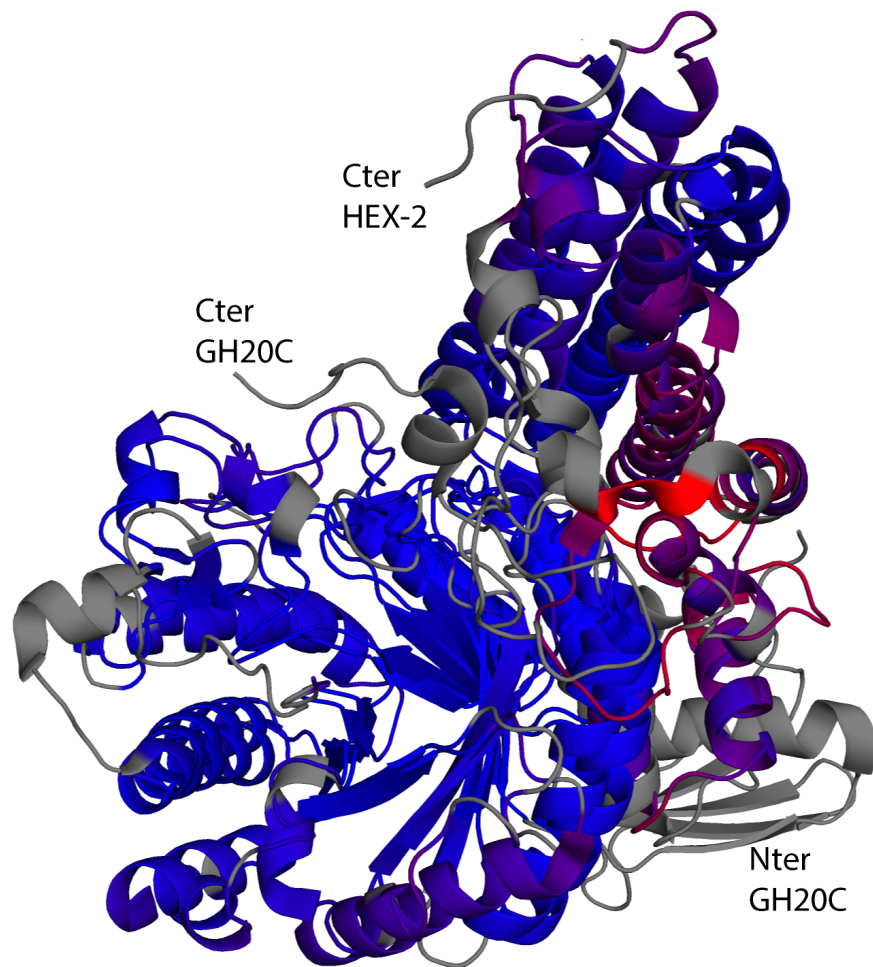

**Supplementary Figure S6:** Superimposition of *T. suis* HEX-2 (8QK1) and *S. pneumoniae* GH20C (5A6J) monomeric crystal structures coloured by RMSD as visualized with pymol (free version 2.5.0, Schrodinger LLC). The distances between aligned C-alpha atom pairs are stored as B-factors of these residues, which are coloured by a spectrum ranging from blue specifying the minimum pairwise RMSD and red indicating the maximum. Unaligned residues are coloured grey. The barrels containing the binding pocket superimpose well, but the N- and C-termini differ (in this view, the N-terminus of HEX-2 is hidden under the barrel). Sequence identity of HEX-2 and GH20C is 29%. See also **Figure 6** of the main text for other visualisations.
